# Supplementary material for: Development of a Bicistronic Yellow Fever Live Attenuated Vaccine with Reduced Neurovirulence and Viscerotropism
Source: PubMed Central journal article supplement (PMC9602263; doi:10.1128/spectrum.02246-22), 2022-08-18
Supplement: spectrum.02246-22-s0001.pdf [file spectrum.02246-22-s0001.pdf]

**Table S1. Primers for construction of 17D-IRES used in this study.**

| <b>Primer</b>      | <b>Sequence (5`-3`)</b>                                      |
|--------------------|--------------------------------------------------------------|
| <b>NOT1-F</b>      | <b>CGACGCGGCCGCGCTAGCGATGAC</b>                              |
| <b>17D-IRES-R1</b> | <b>GGGAGAGGGGTAAACGGCGTTTCCTTGAGGACAATC</b>                  |
| <b>IRES-F</b>      | <b>GGAAACGCCGTTAACCCCTCTCCCTCCCCCCCCCCT</b>                  |
| <b>IRES-R</b>      | <b>GGGATTGTTCCATGGTTGTGGCCATATTATC</b>                       |
| <b>17D-IRES-F2</b> | <b>GGGATTGTTCCATGGTTGTGGCCATATTATC</b>                       |
| <b>Nsi1(-)</b>     | <b>GGCCACAACCATGGAACAATCCCATGATGTTC<br/>TGACTGTGCAATTCCT</b> |
